# Supplementary material for: Mammography Among Women With Severe Mental Illness: Exploring Disparities Through a Large Retrospective Cohort Study
Source: Atypon-hosted journal article supplement (doi:10.1176/appi.ps.201600170), 2017-09-25
Supplement: appi.ps.201600170.ds001.pdf [file appi.ps.201600170.ds001.pdf]

## Mammograms as Outcome Dags

### Direct Effect

#### Primary predictor

#### Adjustment variables

|                 |                                                                    |
|-----------------|--------------------------------------------------------------------|
| Age             | County Type, Healthcare Util, Psych Dx, Race, Substance Abuse      |
| Race            | Age, County Type, Healthcare Util, Psych Dx, Substance Abuse       |
| Psychiatric Dx  | Age, County Type, Healthcare Utilization, Race, Substance Abuse    |
| Substance Abuse | Age, County Type, Healthcare Util, Psychiatric Diagnosis, Race     |
| County Type     | Age, Healthcare Util, Psychiatric Diagnosis, Race, Substance Abuse |
| Healthcare Util | Age, County Type, Psychiatric Diagnosis, Race, Substance Abuse     |

### Total Effect

#### Primary predictor

#### Adjustment variables

|                 |                                                                |
|-----------------|----------------------------------------------------------------|
| Age             | County Type                                                    |
| Race            | County Type                                                    |
| Psychiatric Dx  | Age, Race, Substance Abuse                                     |
| Substance Abuse | Age, County Type, Psychiatric Diagnosis, Race                  |
| County Type     | Age, Race                                                      |
| Healthcare Util | Age, County Type, Psychiatric Diagnosis, Race, Substance Abuse |

## Age Dag

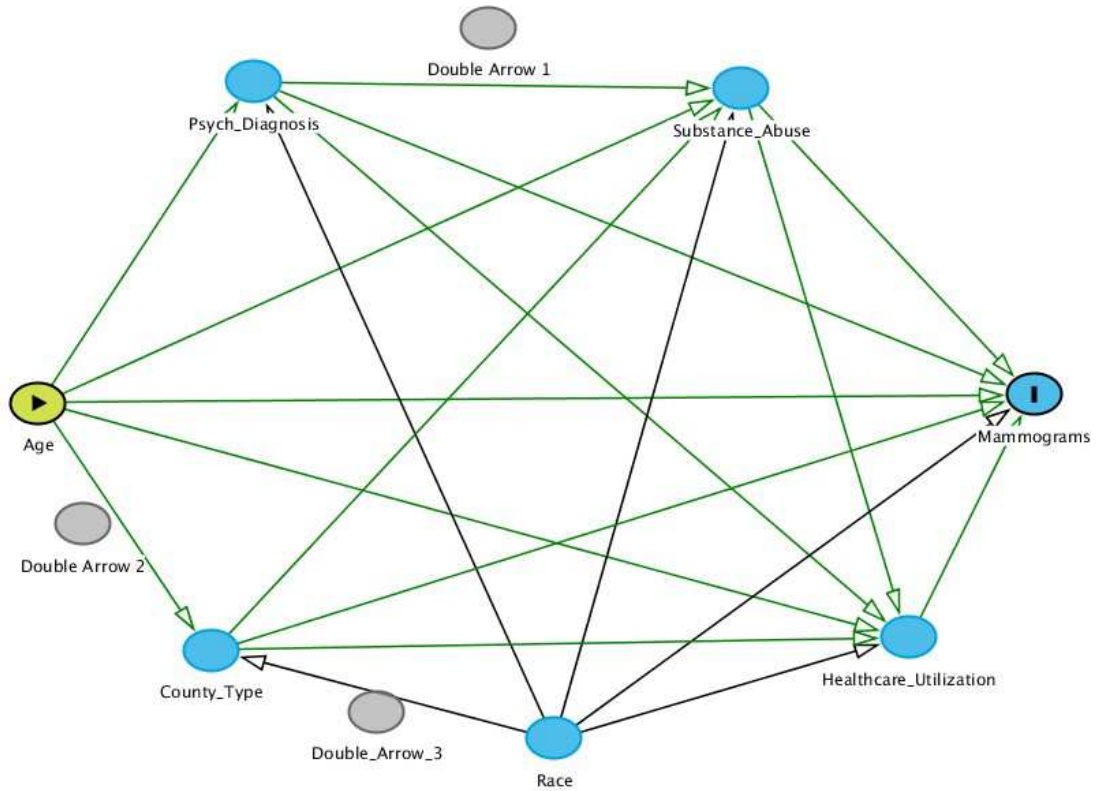

Minimal sufficient adjustment sets for estimating the direct effect of Age on Mammograms:

- {County\_Type, Healthcare\_Utilization, Psych\_Diagnosis, Race, Substance\_Abuse}

Minimal sufficient adjustment sets for estimating the total effect of Age on Mammograms:

- {} County Type (given double arrow)

## Race Dag

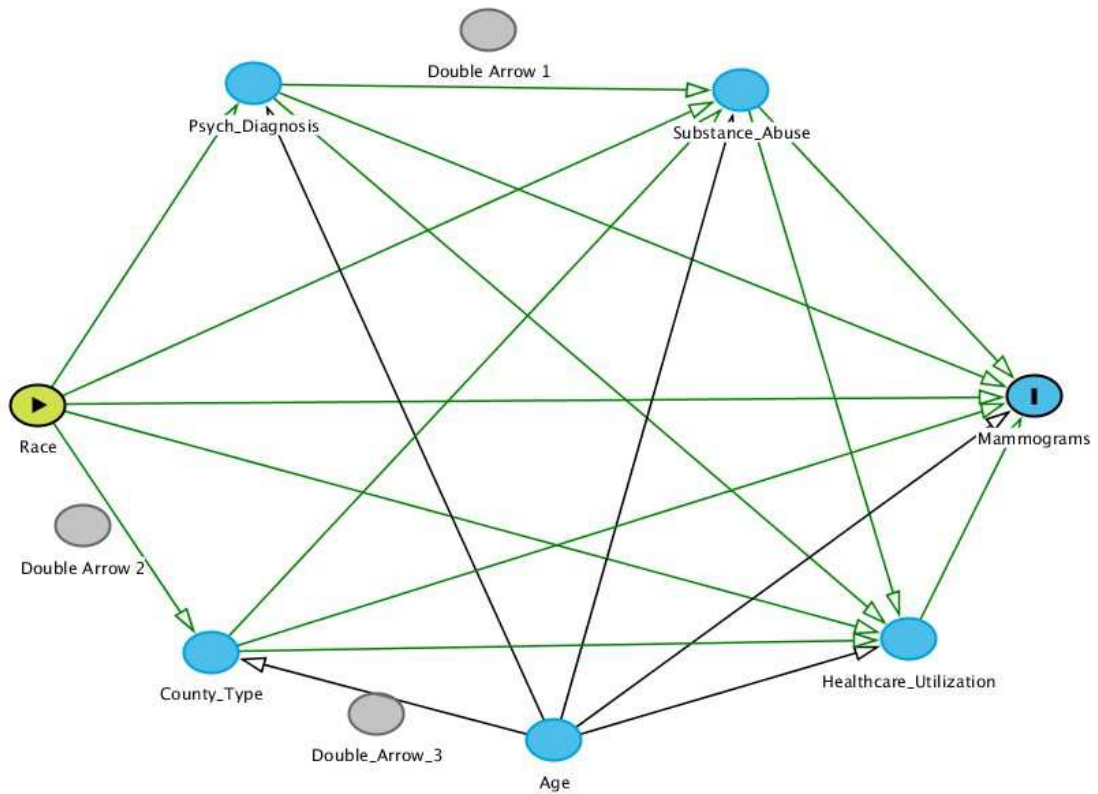

Minimal sufficient adjustment sets for estimating the direct effect of Race on Mammograms:

- {Age, County\_Type, Healthcare\_Utilization, Psych\_Diagnosis, Substance\_Abuse}

Minimal sufficient adjustment sets for estimating the total effect of Race on Mammograms:

- {} County Type (given double arrow)

## Psych Diagnosis Dag

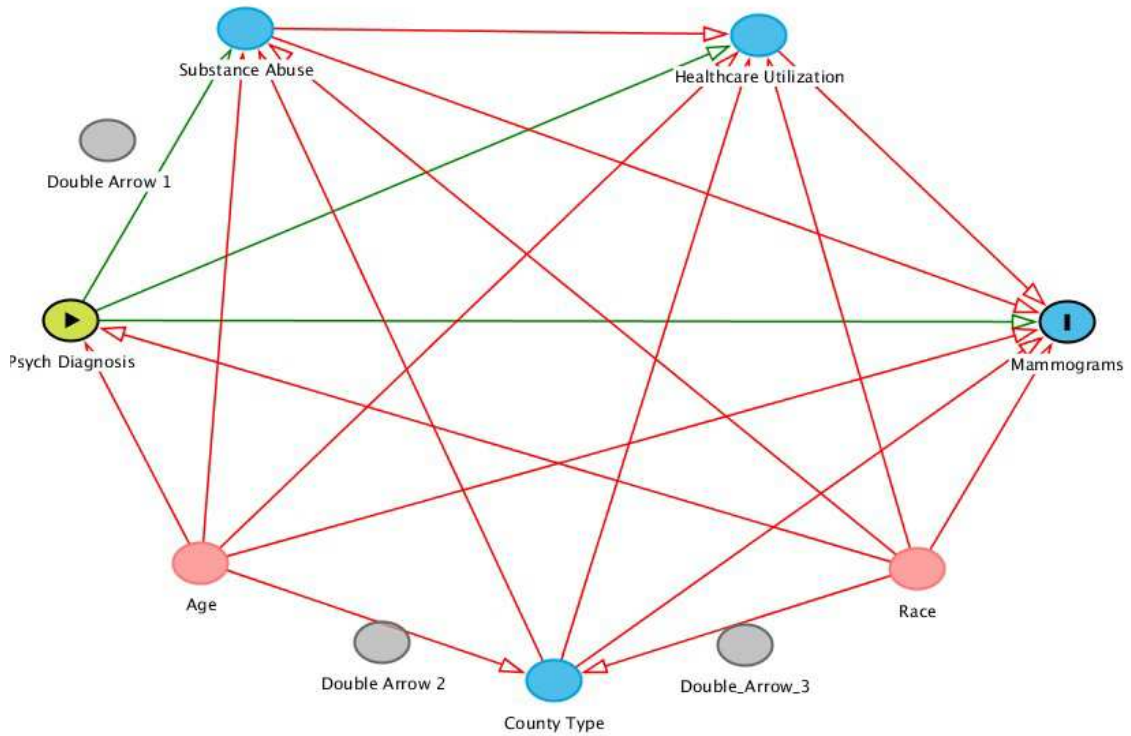

Minimal sufficient adjustment sets for estimating the direct effect of Psych Diagnosis on Mammograms:

- {Age, County Type, Healthcare Utilization, Race, Substance Abuse }

Minimal sufficient adjustment sets for estimating the total effect of Psych Diagnosis on Mammograms:

- {Age, Race} Substance Abuse (given double arrow)

## Healthcare Utilization Dag

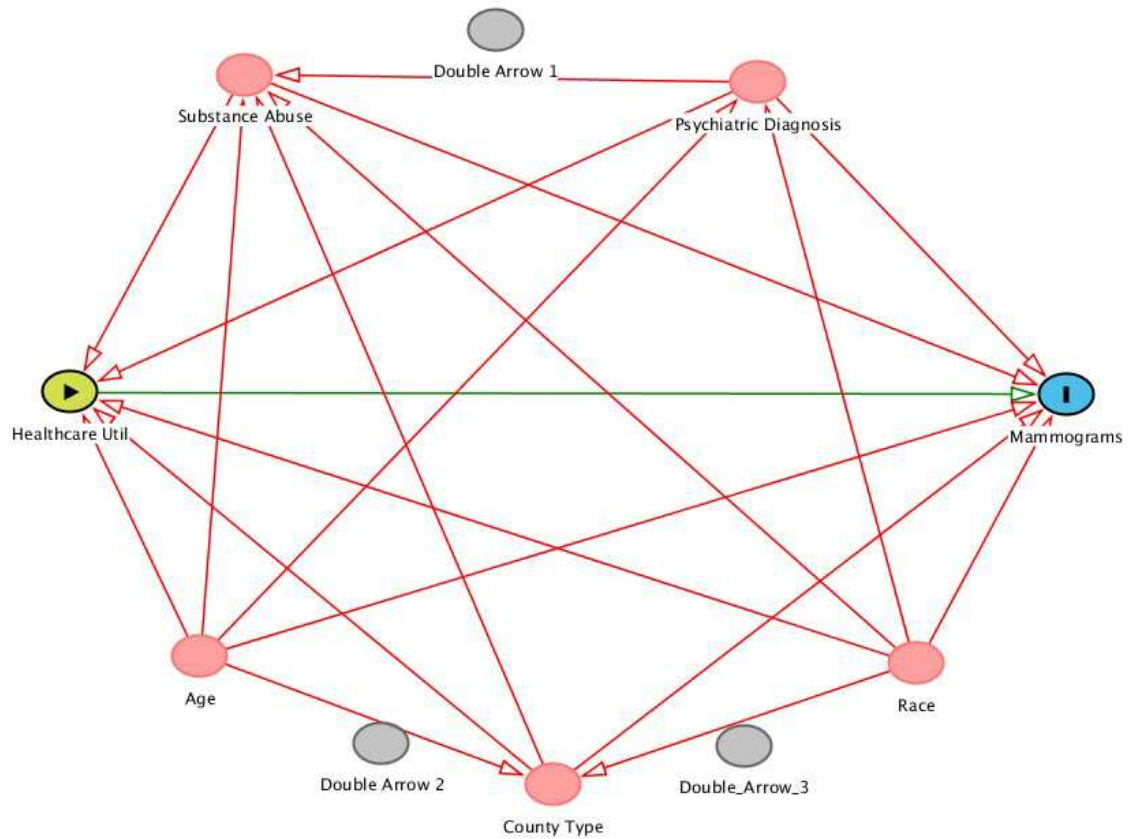

Total and direct effects are equal in this model.

Minimal sufficient adjustment sets for estimating the total effect of Healthcare Util on Mammograms:

- {Age, County Type, Psychiatric Diagnosis, Race, Substance Abuse }

## Substance Abuse Dag

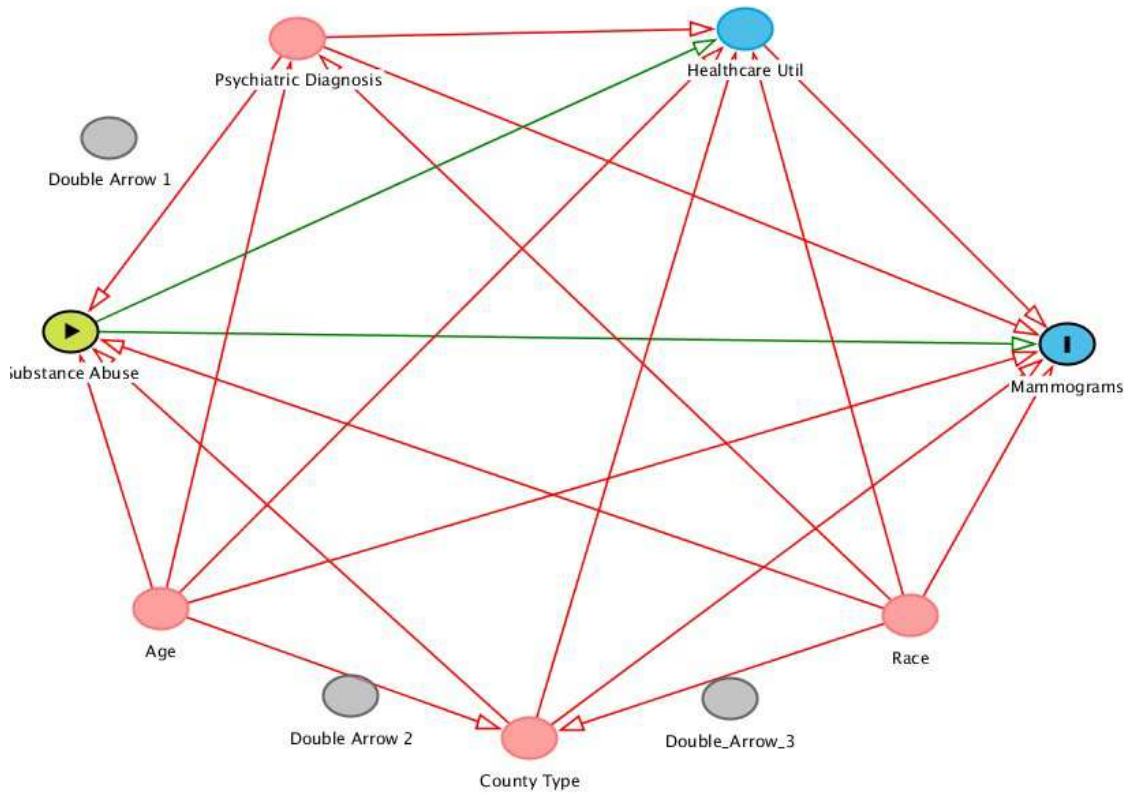

Minimal sufficient adjustment sets for estimating the direct effect of Substance Abuse on Mammograms:

- {Age, County Type, Healthcare Util, Psychiatric Diagnosis, Race}

Minimal sufficient adjustment sets for estimating the total effect of Substance Abuse on Mammograms:

- {Age, County Type, Psychiatric Diagnosis, Race}

### County Type Dag

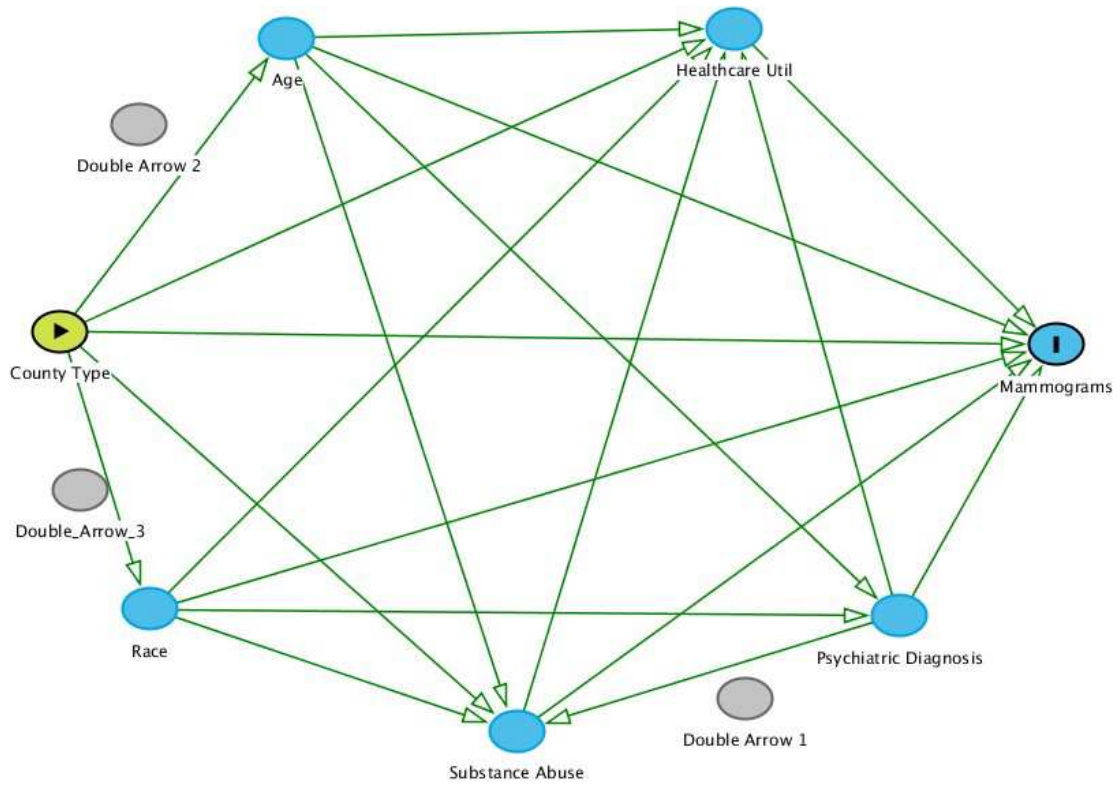

Minimal sufficient adjustment sets for estimating the direct effect of County Type on Mammograms:

- {Age, Healthcare Util, Psychiatric Diagnosis, Race, Substance Abuse}

Minimal sufficient adjustment sets for estimating the total effect of County Type on Mammograms:

- {} Age, Race (given double arrow)
